# Supplementary material for: Targeting the FGF/FGFR axis and its co-alteration allies
Source: PubMed Central journal article supplement (PMC9808461; doi:10.1016/j.esmoop.2022.100647), 2022-11-29

**Supplementary Table S1.** Summary of FGFR inhibitors used in the UCSD cohort (N = 16):  
IC<sub>50</sub>

|              | Target IC <sub>50</sub> *                                                                            |
|--------------|------------------------------------------------------------------------------------------------------|
| Lenvatinib   | VEGFR1 (4.7 nM), VEGFR2 (3 nM), KIT (85 nM), PDGFR $\alpha$ (29 nM), FGFR1-4 (27–61 nM) <sup>1</sup> |
| Ponatinib    | VEGFR2 (1.5 nM), KIT (12.5 nM), PDGFR $\alpha$ (1.1 nM), FGFR1-4 (2.2–18.2 nM) <sup>2</sup>          |
| Pazopanib    | VEGFR2 (8 nM), KIT (2.6 nM), PDGFR $\beta$ (3 nM), FGFR1-3 (84 nM) <sup>3,4</sup>                    |
| Infigratinib | FGFR1 (1.1 nM), FGFR2 (1.0 nM), FGFR3 (2.0 nM), FGFR4 (61 nM) <sup>5</sup>                           |

\*Values listed were obtained in cell-free assays.

**Abbreviations:** IC<sub>50</sub> = 50% inhibitory concentration

### References for Supplementary Table S1

1. Hussein Z, Mizuo H, Hayato S, Namiki M, Shumaker R. Clinical Pharmacokinetic and Pharmacodynamic Profile of Lenvatinib, an Orally Active, Small-Molecule, Multitargeted Tyrosine Kinase Inhibitor. *Eur J Drug Metab Pharmacokinet.* 2017;42(6):903-914.
2. O'Hare T, Shakespeare WC, Zhu X, et al. AP24534, a Pan-BCR-ABL Inhibitor for Chronic Myeloid Leukemia, Potently Inhibits the T315I Mutant and Overcomes Mutation-Based Resistance. *Cancer Cell.* 2009;16(5):401-412.
3. FDA. PHARMACOLOGY/TOXICOLOGY REVIEW AND EVALUATION (Pazopanib). Accessed September 23, 2021. [https://www.accessdata.fda.gov/drugsatfda\\_docs/nda/2009/022465s000\\_PharmR.pdf](https://www.accessdata.fda.gov/drugsatfda_docs/nda/2009/022465s000_PharmR.pdf)
4. Roskoski R. The role of fibroblast growth factor receptor (FGFR) protein-tyrosine kinase inhibitors in the treatment of cancers including those of the urinary bladder. *Pharmacol Res.* 2020;151:104567.
5. FDA. Highlights of prescribing information (TRUSELTIQ). Accessed September 22, 2021. [https://www.accessdata.fda.gov/drugsatfda\\_docs/label/2021/214622s000lbl.pdf](https://www.accessdata.fda.gov/drugsatfda_docs/label/2021/214622s000lbl.pdf)

**Supplementary Table S2. Rationale for suggested therapies with FGFR inhibitor-based therapies (N = 16)**

| ID | Diagnosis               | Molecular Characteristics<br>(Laboratory vendor, source)                                                                                                                                                                                                                                                          | Treatment Regimen       | Stable disease ≥6 months or PR/CR | Rationale for therapy                                                                                                                                                                                                                                                                                                               | References |
|----|-------------------------|-------------------------------------------------------------------------------------------------------------------------------------------------------------------------------------------------------------------------------------------------------------------------------------------------------------------|-------------------------|-----------------------------------|-------------------------------------------------------------------------------------------------------------------------------------------------------------------------------------------------------------------------------------------------------------------------------------------------------------------------------------|------------|
| 1  | Gastroesophageal cancer | (FM, tissue)<br><i>FGFR2</i> amplification<br><i>CDKN2A</i> loss<br><i>MYC</i> amplification<br><i>APC</i> I1307K<br><i>ARID1A</i> P2139fs*62<br><i>TP53</i> F113C                                                                                                                                                | Ponatinib               | No                                | Ponatinib is a potent FGFR inhibitor ( <b>Supplemental Table S1</b> ).                                                                                                                                                                                                                                                              |            |
| 2  | Bladder cancer          | (FM, tissue)<br><i>FGFR1</i> amplification<br><i>NF1</i> Q1218*<br><i>TP53</i> R267G<br><i>ERBB2</i> I767M<br><i>MLL2</i> P3668fs*5,<br>splice site 177-1G>T<br><i>ZNF703</i> amplification                                                                                                                       | Pazopanib               | No                                | Pazopanib is a potent FGFR inhibitor ( <b>Supplemental Table S1</b> ).                                                                                                                                                                                                                                                              |            |
| 3  | Urothelial cancer       | (FM, tissue)<br><i>FRS2</i> amplification<br><i>AKT2</i> amplification<br><i>BRIP1</i> truncation<br><i>PIK3CA</i> H450_V461>GS<br><i>RAF1</i> amplification<br><i>MDM2</i> amplification<br><i>MYC</i> amplification<br><i>RNF43</i> S262*<br><i>ARID2</i> S889*<br><br>(GH, blood)<br><i>FGFR2</i> V516L, G131R | Lenvatinib, Olaparib    | No                                | <ul style="list-style-type: none"> <li>• Lenvatinib is a potent FGFR inhibitor (<b>Supplemental Table S1</b>).</li> <li>• BRIP1 inactivation can lead to homologous recombination repair deficiency, which may be targetable with PARP inhibitors such as olaparib.</li> </ul>                                                      | 1,2        |
| 4  | Biliary cancer          | (FM, tissue)<br><i>FGFR2-BICC1</i> fusion                                                                                                                                                                                                                                                                         | Infigratinib            | Yes                               | Infigratinib is a potent selective FGFR inhibitor ( <b>Supplemental Table S1</b> ).                                                                                                                                                                                                                                                 |            |
| 5  | Biliary cancer          | (FM, tissue)<br><i>FGFR2-BICC2</i> fusion<br><i>POLE</i> R446Q<br><br>(GH, blood)<br><i>PIK3CA</i> amplification                                                                                                                                                                                                  | Lenvatinib, Everolimus  | No                                | <ul style="list-style-type: none"> <li>• Lenvatinib is a potent FGFR inhibitor (<b>Supplemental Table S1</b>).</li> <li>• <i>PIK3CA</i> amplification can activate PI3K pathway, which can be targeted with mTOR inhibitor (everolimus).</li> </ul>                                                                                 | 3,4        |
| 6  | Biliary cancer          | (FM, tissue)<br><i>FRS2</i> amplification<br><i>MDM2</i> amplification<br><i>CDKN2A</i> p16INK4a R80*, p14ARF P94L<br><i>CEBPA</i> G103_G104del                                                                                                                                                                   | Lenvatinib, Palbociclib | Yes                               | <ul style="list-style-type: none"> <li>• Lenvatinib is a potent FGFR inhibitor (<b>Supplemental Table S1</b>).</li> <li>• <i>CDKN2A</i> alteration can activate CDK4/6 which can be targeted with CDK4/6 inhibitor (palbociclib).</li> </ul>                                                                                        | 5,6        |
| 7  | Osteosarcoma            | (FM, tissue)<br><i>FGF23</i> amplification<br><i>FGF6</i> amplification<br><i>FRS2</i> amplification<br><i>CDK4</i> amplification<br><i>CCND2</i> amplification<br><i>MDM2</i> amplification                                                                                                                      | Lenvatinib, Palbociclib | Yes                               | <ul style="list-style-type: none"> <li>• Lenvatinib is a potent FGFR inhibitor (<b>Supplemental Table S1</b>).</li> <li>• <i>CDK4</i> and <i>CCND2</i> amplification may be targetable with CDK4/6 inhibitor (palbociclib).</li> </ul>                                                                                              | 7          |
| 8  | Gastroesophageal cancer | (FM, tissue)<br><i>FGF19</i> amplification<br><i>FGF3</i> amplification<br><i>FGF4</i> amplification<br><i>CCND1</i> amplification<br><i>CDK6</i> amplification<br><i>MET</i> amplification<br><i>ARID1A</i> R1276*<br><i>TERC</i> amplification<br><i>TP53</i> P278L<br>TMB: intermediate (8Muts/Mb)             | Lenvatinib, Nivolumab   | No                                | <ul style="list-style-type: none"> <li>• Lenvatinib is a potent FGFR inhibitor (<b>Supplemental Table S1</b>).</li> <li>• <i>CDK6</i> and <i>CCND1</i> amplification can be targeted with CDK4/6 inhibitor (palbociclib).</li> <li>• Patients with intermediate TMB could benefit from anti-PD-L1 inhibitor (nivolumab).</li> </ul> | 7,8        |
| 9  | Glioneuronal tumor      | (FM, tissue)<br><i>FGFR1</i> K656E                                                                                                                                                                                                                                                                                | Lenvatinib              | Yes                               | • Lenvatinib is a potent FGFR inhibitor ( <b>Supplemental Table S1</b> ).                                                                                                                                                                                                                                                           |            |

|    |                                |                                                                                                                                                                                                                                                                                                                                                                                                    |                                          |     |                                                                                                                                                                                                                                                                                                                                     |       |
|----|--------------------------------|----------------------------------------------------------------------------------------------------------------------------------------------------------------------------------------------------------------------------------------------------------------------------------------------------------------------------------------------------------------------------------------------------|------------------------------------------|-----|-------------------------------------------------------------------------------------------------------------------------------------------------------------------------------------------------------------------------------------------------------------------------------------------------------------------------------------|-------|
| 10 | Endometrial cancer             | (FM, tissue)<br><i>FGFR2</i> N549K<br><i>PIK3CA</i> G1049R<br><i>PTEN</i> K125N<br><i>ARID1A</i> Q2115fs*33<br><i>CHD4</i> R975H<br><i>CTCF</i> S282fs*21<br><i>MLL3</i> S2123*<br><i>TP53</i> Y163C                                                                                                                                                                                               | Lenvatinib,<br>Everolimus                | No  | <ul style="list-style-type: none"> <li>• Lenvatinib is a potent FGFR inhibitor (<b>Supplemental Table S1</b>).</li> <li>• <i>PIK3CA</i> alteration can be targetable with mTOR inhibitor (everolimus)</li> </ul>                                                                                                                    | 9     |
| 11 | Gastroesophageal cancer        | (FM, tissue)<br><i>FGF19</i> amplification<br><i>FGF3</i> amplification<br><i>FGF4</i> amplification<br><i>CCND1</i> amplification<br><i>CDK6</i> amplification<br><i>CDKN2A/B</i> loss<br><i>PIK3CA</i> amplification<br><i>SOX2</i> amplification<br><i>PIK3CG</i> amplification<br><i>PRKCI</i> amplification<br><i>TERC</i> amplification<br><i>TP53</i> G245D<br>TMB: intermediate (7Muts/Mb) | Lenvatinib,<br>Palbociclib,<br>Nivolumab | No  | <ul style="list-style-type: none"> <li>• Lenvatinib is a potent FGFR inhibitor (<b>Supplemental Table S1</b>).</li> <li>• <i>CDK6</i> and <i>CCND1</i> amplification can be targeted with CDK4/6 inhibitor (palbociclib).</li> <li>• Patients with intermediate TMB could benefit from anti-PD-L1 inhibitor (nivolumab).</li> </ul> |       |
| 12 | Gastroesophageal cancer        | (FM, tissue)<br><i>FGFR2</i> amplification<br><i>TP53</i> A159V                                                                                                                                                                                                                                                                                                                                    | Lenvatinib                               | No  | Lenvatinib is a potent FGFR inhibitor ( <b>Supplemental Table S1</b> ).                                                                                                                                                                                                                                                             |       |
| 13 | Ovarian cancer                 | (FM, tissue)<br><i>FGFR4</i> amplification<br><i>FLT4</i> amplification<br><i>PDGFRB</i> amplification<br><i>CDK6</i> amplification<br><i>TP53</i> K132R<br><br>(GH, blood)<br><i>TP53</i> K132, K120M<br><i>PIK3CA</i> E545K<br><i>MET</i> amplification<br><i>PDGFRA</i> amplification<br><i>KIT</i> amplification                                                                               | Lenvatinib,<br>Palbociclib               | Yes | <ul style="list-style-type: none"> <li>• Lenvatinib is a potent FGFR inhibitor (<b>Supplemental Table S1</b>).</li> <li>• <i>CDK6</i> amplification may be targetable with CDK4/6 inhibitor (palbociclib).</li> </ul>                                                                                                               |       |
| 14 | Gastrointestinal stromal tumor | (FM, tissue)<br><i>KIT</i> K558_E562del, N822K, V654A<br><i>ARID1A</i> truncation<br><i>NOTCH2</i> P6fs*27<br>TMB: intermediate (7Muts/Mb)<br><br>(GH, blood)<br><i>FGFR1</i> amplification<br><i>MYC</i> amplification<br><i>ERBB2</i> amplification                                                                                                                                              | Lenvatinib,<br>Pembrolizumab             | Yes | <ul style="list-style-type: none"> <li>• Lenvatinib is a potent FGFR inhibitor (<b>Supplemental Table S1</b>).</li> <li>• Patients with intermediate TMB could benefit from PD-L1 inhibitor (pembrolizumab).</li> </ul>                                                                                                             | 8     |
| 15 | Adenoid cystic carcinoma       | (FM, tissue)<br><i>FGF19</i> amplification<br><i>FGF3</i> amplification<br><i>FGF4</i> amplification<br><i>CCND1</i> amplification<br><i>FANCA</i> F1263del<br><br>(GH, blood)<br><i>FGFR1</i> amplification                                                                                                                                                                                       | Lenvatinib,<br>Palbociclib               | No  | <ul style="list-style-type: none"> <li>• Lenvatinib is a potent FGFR inhibitor (<b>Supplemental Table S1</b>).</li> <li>• <i>CCND1</i> amplification may be targetable with CDK4/6 inhibitor (palbociclib).</li> </ul>                                                                                                              |       |
| 16 | Undifferentiated sarcoma       | (FM, tissue)<br><i>FGFR3</i> amplification<br><i>AKT2</i> amplification<br><i>BRCA2</i> R1190W<br><i>CCNE1</i> amplification<br><i>CDK4</i> amplification<br><i>MDM2</i> amplification<br><i>AR</i> amplification                                                                                                                                                                                  | Pazopanib,<br>Everolimus                 | No  | <ul style="list-style-type: none"> <li>• Pazopanib is a potent FGFR inhibitor (<b>Supplemental Table S1</b>).</li> <li>• <i>AKT2</i> amplification may be targetable with mTOR inhibitor (everolimus).</li> </ul>                                                                                                                   | 10,11 |

**Abbreviations:** FM, Foundation Medicine; GH, Guardant Health; Muts, mutations; TMB, tumor mutation burden; PARP, Poly (ADP-ribose) polymerase; mTOR; mammalian target of rapamycin

### References for Supplementary Table S2

1. Yang H, Liu Z, Wang Y, et al. Olaparib is effective for recurrent urothelial carcinoma with BRCA2 pathogenic germline mutation: first report on olaparib response in recurrent UC. *Ther Adv Med Oncol.* 2020;12:1758835920970845.
2. Garje R, Vaddepally RK, Zakharia Y. PARP Inhibitors in Prostate and Urothelial Cancers. *Front Oncol.* 2020;10:114.
3. Lau DK, Tay RY, Yeung YH, et al. Phase II study of everolimus (RAD001) monotherapy as first-line treatment in advanced biliary tract cancer with biomarker exploration: the RADiChol Study. *Br J Cancer.* 2018;118(7):966-971.
4. Wu CE, Chen MH, Yeh CN. mTOR Inhibitors in Advanced Biliary Tract Cancers. *Int J Mol Sci.* 2019;20(3):500.
5. Ahn ER, Mangat PK, Garrett-Mayer E, et al. Palbociclib in Patients With Non-Small-Cell Lung Cancer With CDKN2A Alterations: Results From the Targeted Agent and Profiling Utilization Registry Study. *JCO Precis Oncol.* 2020;4:757-766.
6. Min A, Kim YJ, Lee M, Lee KH, Im SA. Abstract PS5-40: CDKN2A loss can be a predictive marker of palbociclib in breast and gastric cancer. *Cancer Res.* 2021;81(4 Supplement):PS5-40.
7. Schettini F, De Santo I, Rea CG, et al. CDK 4/6 Inhibitors as Single Agent in Advanced Solid Tumors. *Front Oncol.* 2018;8:608.
8. Galuppini F, Dal Pozzo CA, Deckert J, Loupakis F, Fassan M, Baffa R. Tumor mutation burden: from comprehensive mutational screening to the clinic. *Cancer Cell Int.* 2019;19(1):209.
9. Barra F, Evangelisti G, Ferro Desideri L, et al. Investigational PI3K/AKT/mTOR inhibitors in development for endometrial cancer. *Expert Opin Investig Drugs.* 2019;28(2):131-142.
10. Tian T, Li X, Zhang J. mTOR Signaling in Cancer and mTOR Inhibitors in Solid Tumor Targeting Therapy. *Int J Mol Sci.* 2019;20(3):755.
11. Song M, Bode AM, Dong Z, Lee MH. AKT as a Therapeutic Target for Cancer. *Cancer Res.* 2019;79(6):1019-1031.

**Supplementary Figure S1.** STROBE diagram identifying eligible study patients from MSK-IMPACT Clinical Sequencing Cohort.

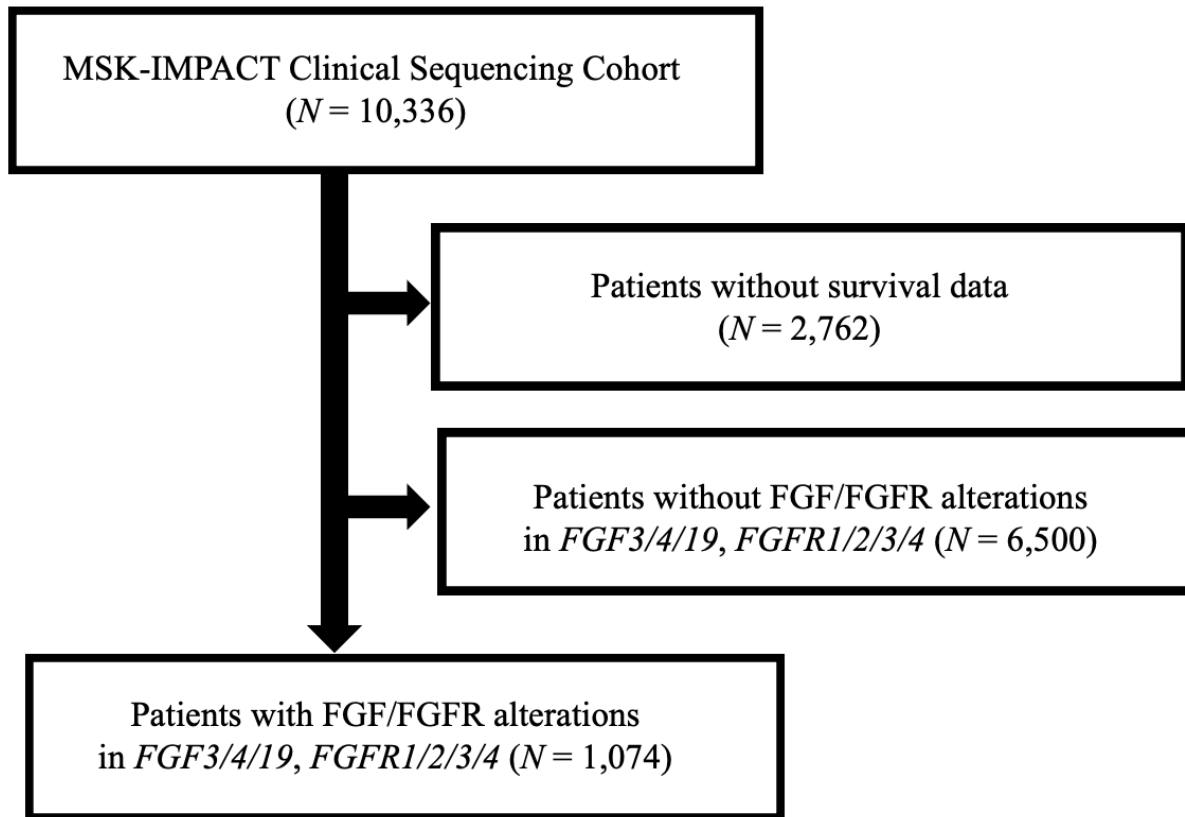

*FGF6, FGF23, FRS2* genes that were found in the UCSD cohort were not listed since they were not assessed in the MSK-IMPACT Clinical Sequencing Cohort.

**Supplementary Figure S2.** Patient flow of 858 cases discussed at UCSD Molecular Tumor Board (MTB).

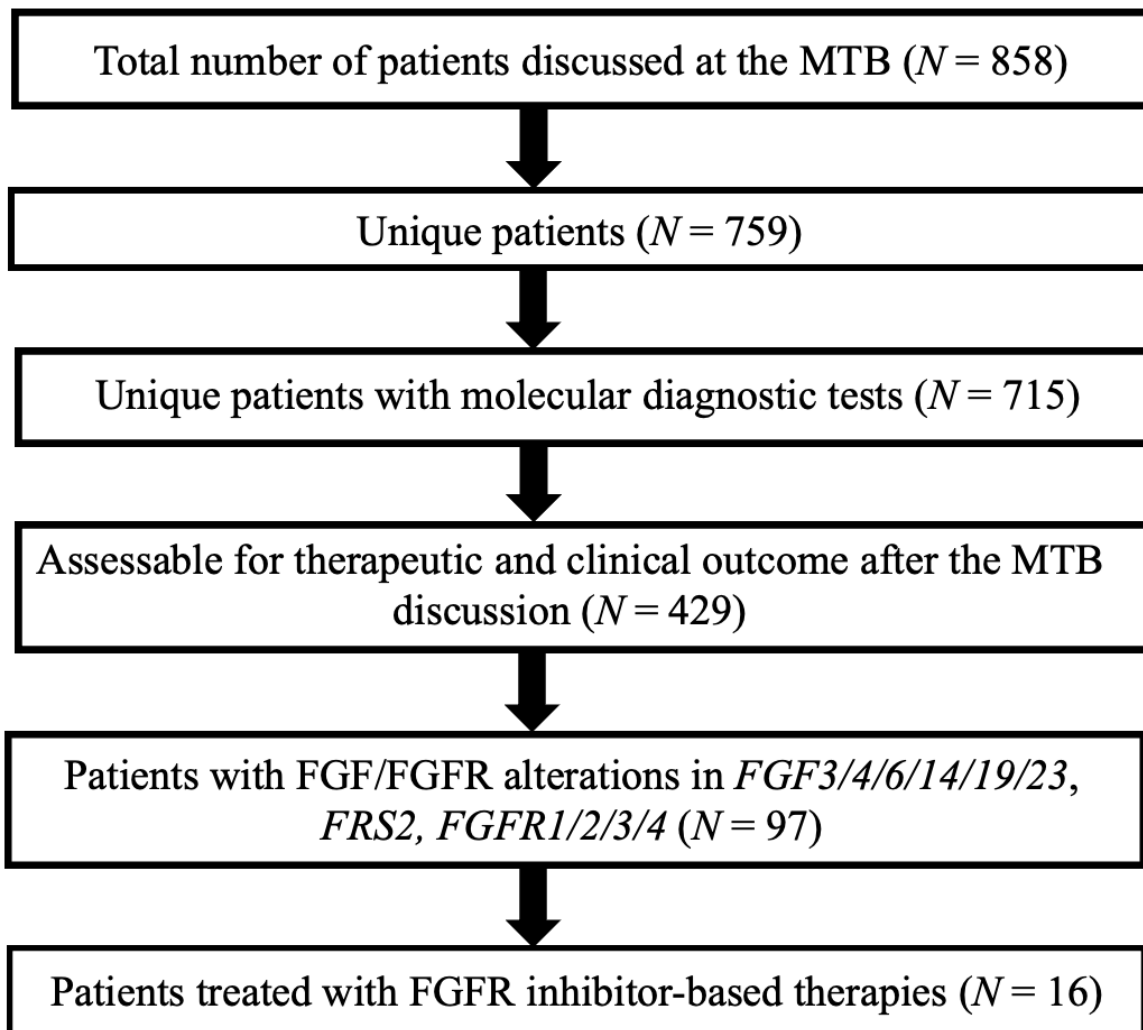

Supplement: mmc1.pdf [file mmc1.pdf]
